# Supplementary material for: Translation is required for miRNA-dependent decay of endogenous transcripts
Source: bioRxiv or medRxiv preprint supplement (doi:10.1101/2020.01.21.913483), 2020-01-21

Figure S1

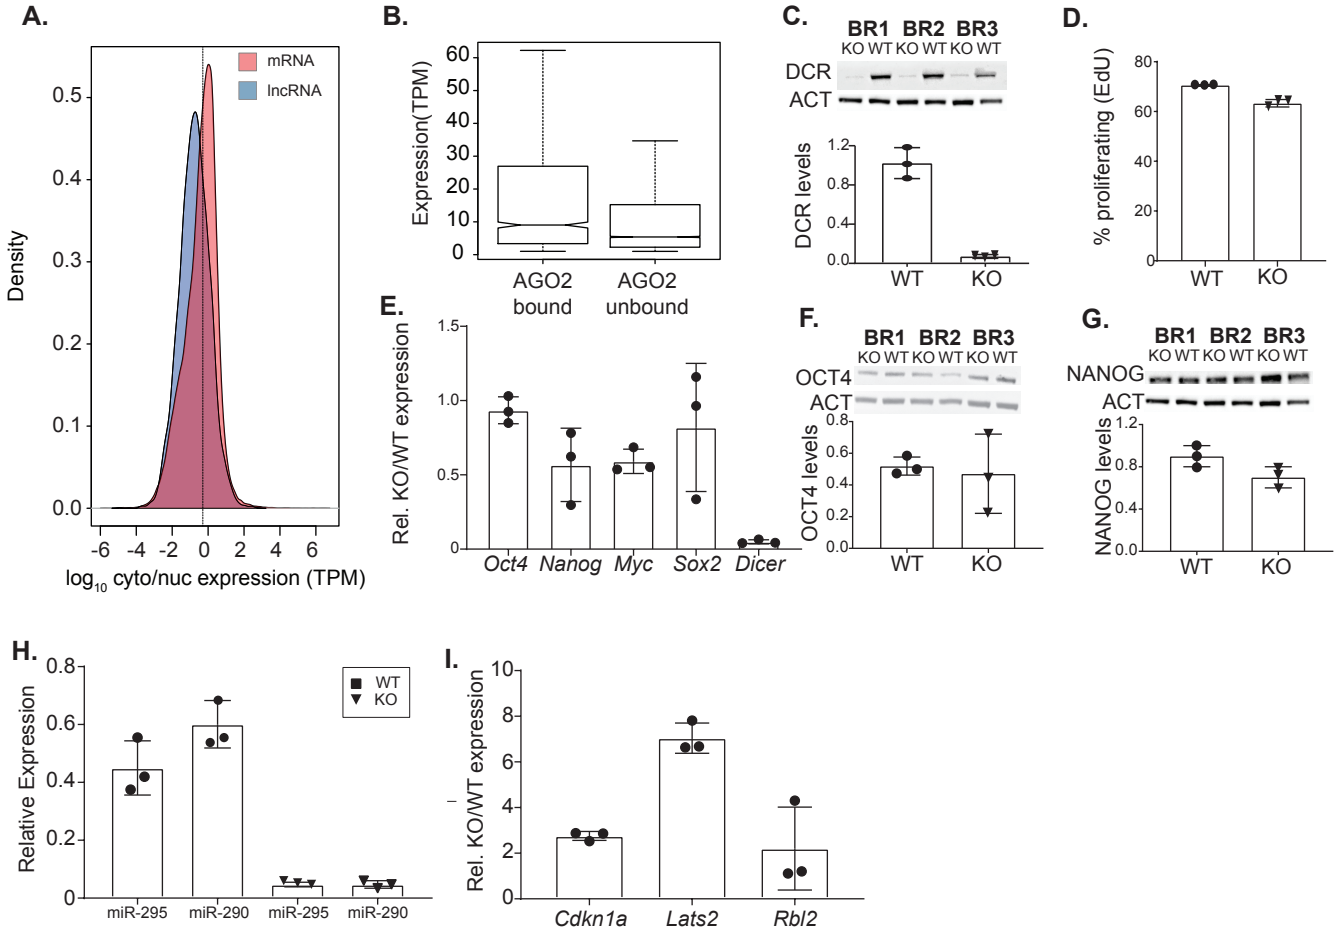

Supplement: Supplementary file [file media-1.pdf]
