# Supplementary material for: Translation is required for miRNA-dependent decay of endogenous transcripts
Source: bioRxiv or medRxiv preprint supplement (doi:10.1101/2020.01.21.913483), 2020-01-21

Supplementary File 1- Uncropped blots for NANOG and DICER detection

**Ponceau Rouge**

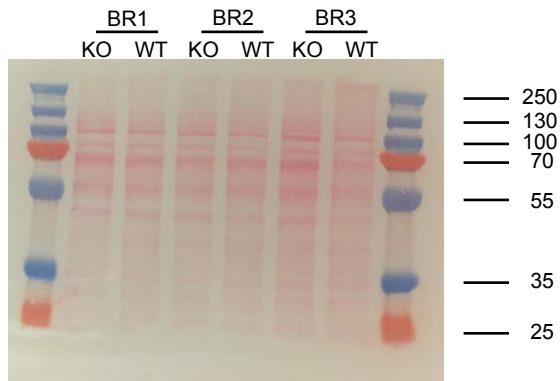

**Membrane was cut at 100 kDa to allow probing of DCR (214 kDa) and NANOG (35 kD)**

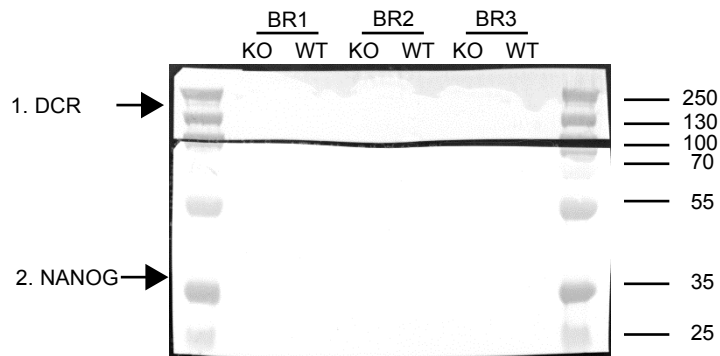

**Uncropped blot**

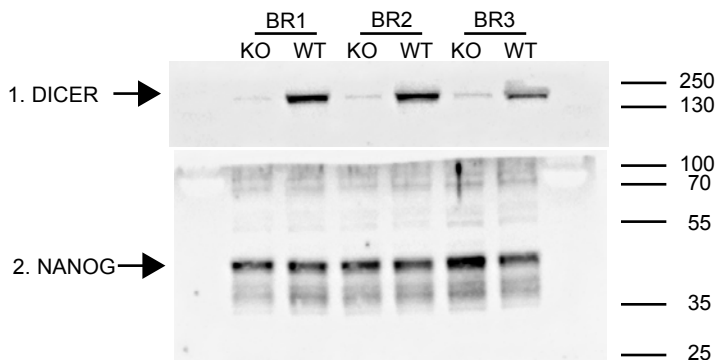

**Lower part of the membrane (2. NANOG) was stripped and probed for ACTIN-β (42 kDa)**

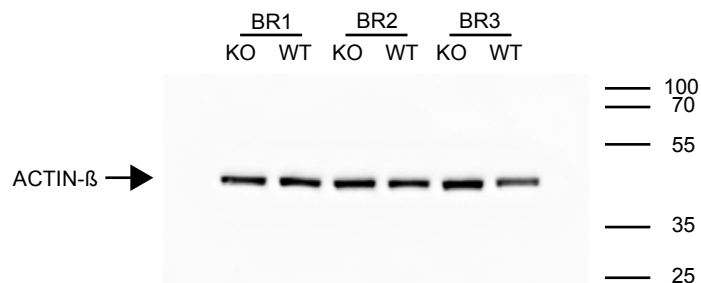

Supplement: Supplementary file [file media-5.pdf]
