# Supplementary material for: Translation is required for miRNA-dependent decay of endogenous transcripts
Source: bioRxiv or medRxiv preprint supplement (doi:10.1101/2020.01.21.913483), 2020-01-21

## Supplementary File 2- Uncropped OCT4 blots

Ponceau Rouge

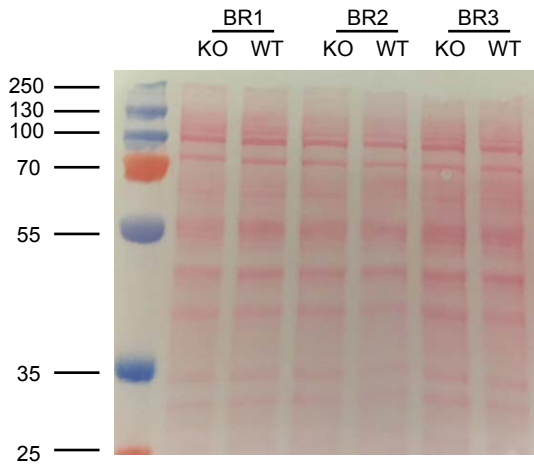

Membrane was cut at 70 kDa- OCT4 (45 kDa) and ACTIN- $\beta$  (42 kDa)

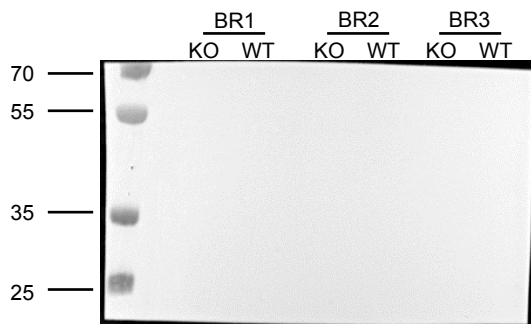

Uncropped OCT4 blot

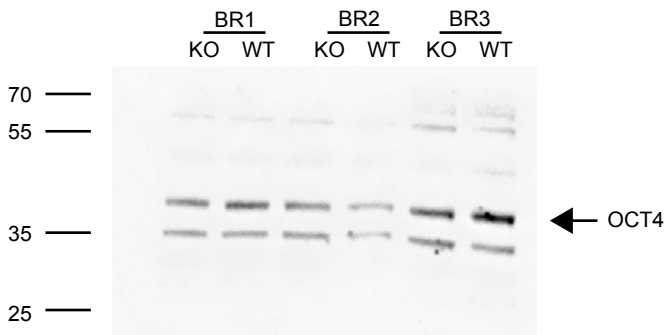

Membrane was striped and probed for ACTIN- $\beta$ . Uncropped blot below.

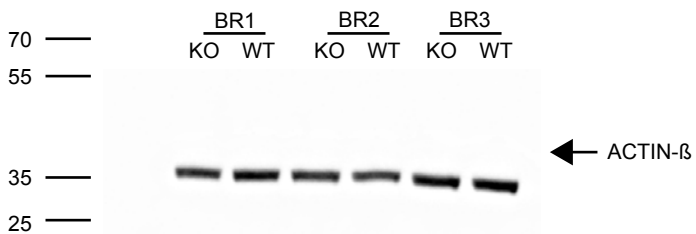

Supplement: Supplementary file [file media-6.pdf]
